# Supplementary material
Source: PubMed Central journal article supplement (PMC4468650)
Supplement: AAC.04816-14_zac007154087so1.pdf [file AAC.04816-14_zac007154087so1.pdf]

**Table S1:** Viability of cells after treatment with 350 $\mu$ M Sb[III] for 6 hours.

| Strain      | % viability |
|-------------|-------------|
| Dd8 +/+     | 95.3%       |
| Dd8 Vc      | 94.3%       |
| Dd8 +/+ +/+ | 93.8%       |
| Dd8 +/-     | 96.5%       |
| Dd8 +/-/+   | 94.6%       |

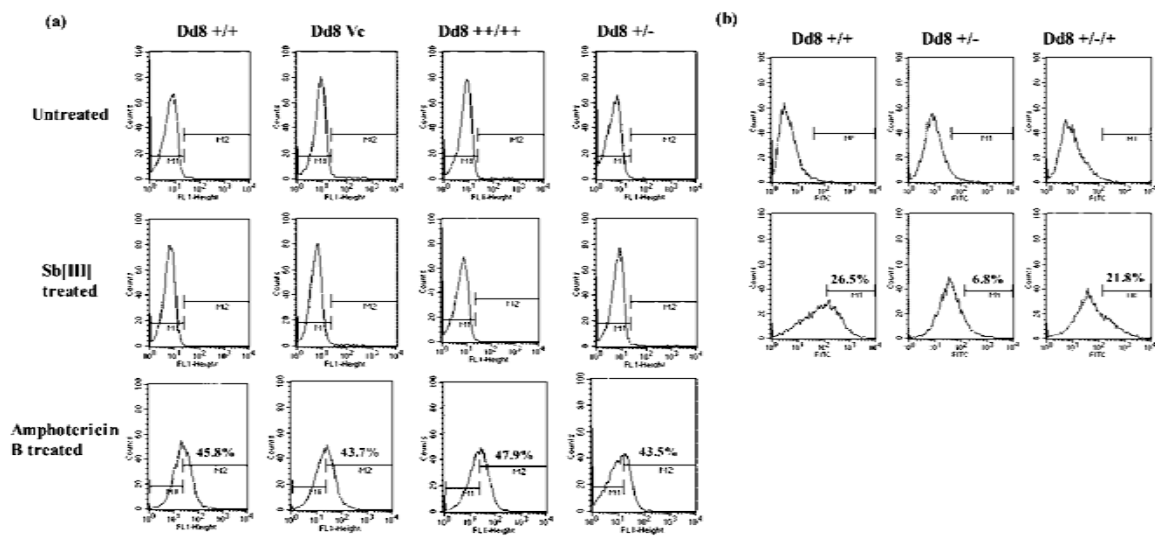

**Figure S1:** Effect of modulation of LdMAPK1 expression on antimony induced apoptosis (a) Caspase-3 activation: cells were treated with Sb[III] or amphotericin B and analysed for caspase activation as described. Markers were marked according to unstained cells. (b) Histogram depicting DNA fragmentation by TUNEL assay. M1 is marked according to unstained cells while M2 represents fluorescence of dUTP-FITC bound to nicked DNA ends. The figures are representative of three independent experiments.
